# Supplementary material
Source: Elsevier journal article supplement (https://www.sciencedirect.com/science/article/pii/S2530064417302183)
Supplement: mmc1 [file S2530064417302183:mmc1.xlsx]

## Sheet: Hoja2
Species/ Frag size (ha) →	Time interval
	1991-1992				2000-2002				2007-2013
	1	10	100	CF	1	10	100	CF	1	10	100	CF
T. ardesiacus	0	8	30	12	0	8	27	17	7	20	28	29
T. caesius	3	7	36	15	4	13	23	20	9	22	34	31
M. axillaris	6	7	11	0	11	12	11	6	29	25	10	23
H. cantator	10	10	24	11	27	15	16	10	23	8	29	29
P. rufifrons	30	20	29	7	21	30	23	14	30	25	37	30
P. albifrons	6	10	30	31	29	29	29	33	30	30	35	29
G. rufigula	10	7	33	18	0	0	0	0	22	23	30	29
W. poecilinotus	1	21	30	30	22	25	30	37	13	30	36	35
G. spirurus	15	33	33	32	29	30	30	30	26	27	30	26
X. pardalotus	3	16	30	12	0	0	0	0	14	29	28	30
M. macconnelli	20	29	27	10	26	26	29	19	28	27	27	31
D. pipra	23	30	49	29	30	30	30	30	30	48	42	31
